# Supplementary material for: 3D visualization of macromolecule synthesis
Source: eLife. 2020 Oct 14;9:e60354. doi: 10.7554/eLife.60354 (PMC7669265; doi:10.7554/eLife.60354)
Supplement: Source code 1. — Source code used in the 3D quantification across scales of a regenerating axolotl humerus depicted in Figures 3 and 4. A tutorial describing the process in detail is provided together with the ImageJ and Matlab scripts. This material is also available on Zenodo at https://doi.org/10.5281/zenodo.3891878. The original image used as the starting point is available at Northeastern University’s Digital Repository and also upon request to the authors. [file elife-60354-code1.zip]

Archive with 2 entries (2 files):
- Source code file 1/codes_MultiscaleAnalysis_v2.zip
- Source code file 1/Tutorial_MultiscaleAnalysis_v3.pdf
