# Supplementary material for: 3D visualization of macromolecule synthesis
Source: eLife. 2020 Oct 14;9:e60354. doi: 10.7554/eLife.60354 (PMC7669265; doi:10.7554/eLife.60354)
Supplement: Supplementary file 1. — Key imaging parameters for imaging whole tissues with a 5× objective in LSFM, or imaging 10 µm tissue sections with a 20× objective in confocal microscopy. [file elife-60354-supp1.xlsx]

## Sheet: Sheet1
	Mean file size (GB)	Maximum file size (GB)	Minimum file size (GB)	Average imaging time (minutes)	x, y pixel size (µm)
LSFM (5X)	25.101	121.8	2.9	30	0.572-0.915, 0.572-0.915
Confocal (20X)	1.34	2.8	0.44	10	0.124-0.312, 0.124-0.312
