# Supplementary figures and images for: 3D visualization of macromolecule synthesis
Source: eLife journal article supplement (doi:10.7554/elife.60354), 2020-10-14

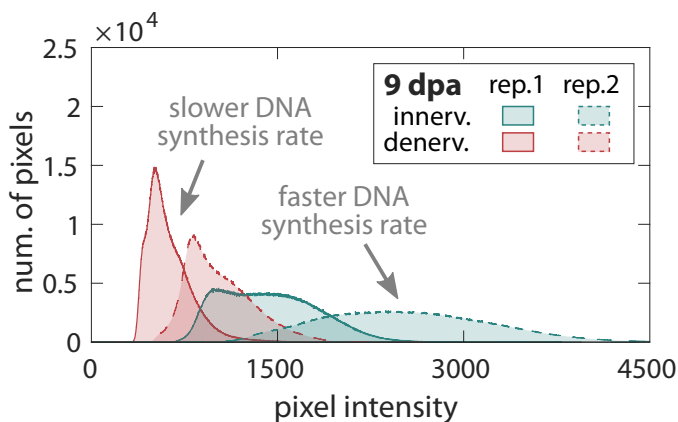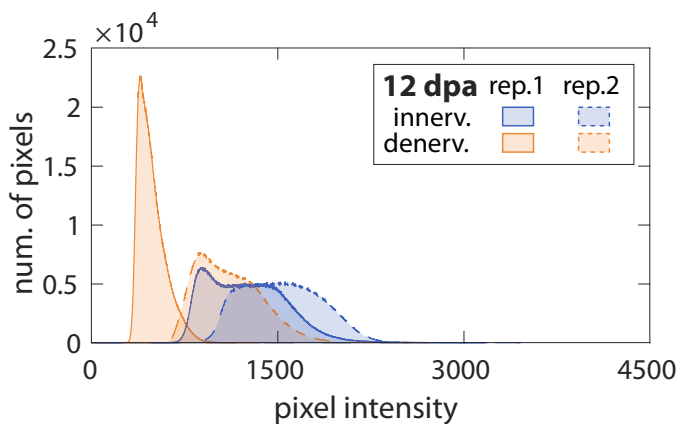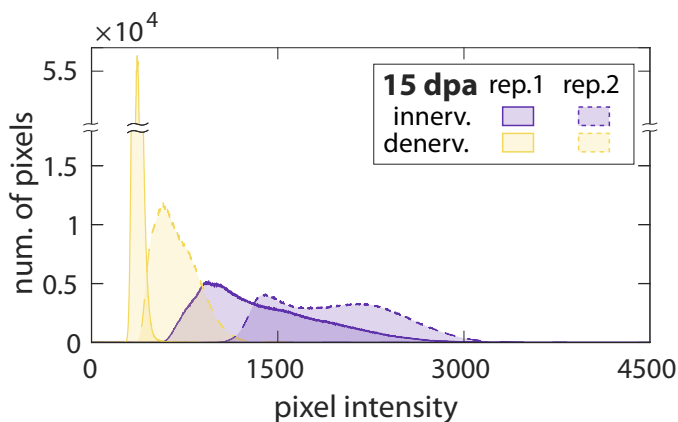

Supplement: code2 [file Fig6_suppl_v1.pdf › Source code file 2/Fig6_suppl_v1.pdf]

**A**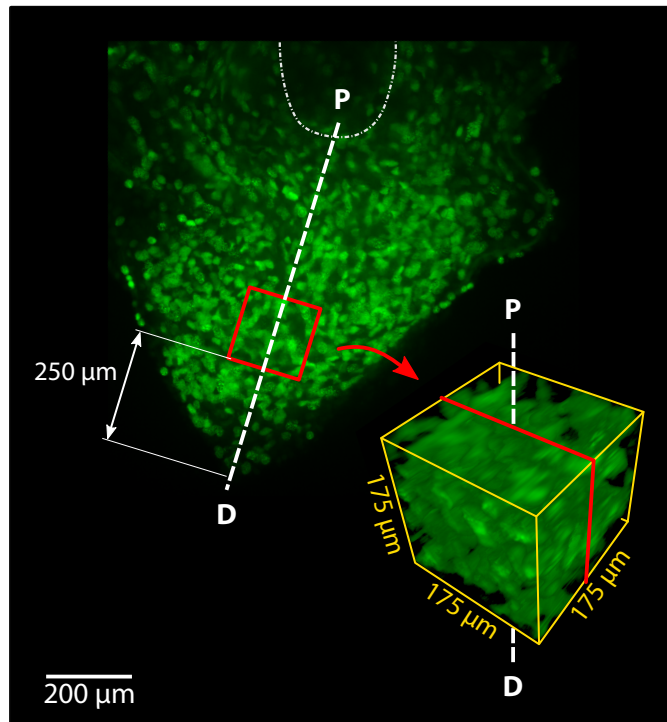**B**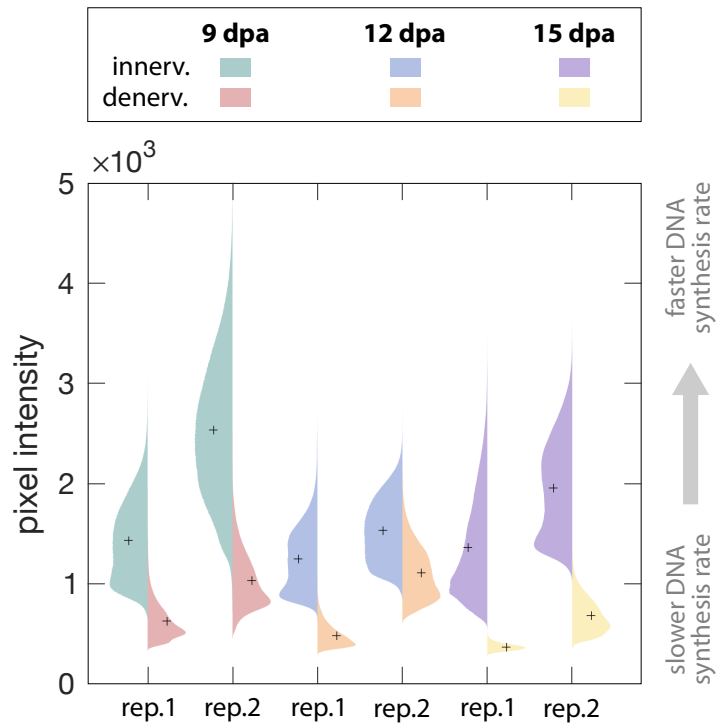

Supplement: code2 [file Fig6_v7.pdf › Source code file 2/Fig6_v7.pdf]
